# Supplementary material for: Regulation of Drosophila Metamorphosis by Xenobiotic Response Regulators
Source: PLOS journal article supplement (doi:10.1371/journal.pgen.1003263), 2013-02-07
Supplement: S7 (10.1371/journal.pgen.1003263.s007) [file journal.pgen.1003263.s007]

**Table S2. Primer sequences used to measure CncC and dKeap1 occupancy by ChIP**

| gene          | position | 5'-primer                   | 3'-primer                  |
|---------------|----------|-----------------------------|----------------------------|
| <i>sad</i>    | -5000    | GCCAACGTCTGGTCAAAAAT        | CCAAGTTCTTTTTGTGCTCTGTT    |
|               | -1200    | CCCCTAATAGACCATAAATATGACAAG | CTTGACGAAGGTTGTGAAAATG     |
|               | 60       | GAGCAGGTGCAGGTGGTTAC        | TCTTCTCGGTCATCGGTGTA       |
|               | 4100     | ATCGCTCATGTTTGCCTTTT        | GCTCAAAGTGTGATGGATCG       |
| <i>dib</i>    | -100     | TTCACCACAGGTAGGCACAA        | CATTCCGGGAAAAAGGCATTA      |
| <i>nvd</i>    | -100     | CGCGTATGCCGGAAAAATA         | GTTCACCGTTTTCGTTAGGG       |
| <i>spok</i>   | 300      | GTCCGCCAAAGTATTTTCCA        | TTACGGTTTTTGGCACATTGA      |
| <i>phm</i>    | 0        | CTGATGTTACCATTGTCTGAACG     | TCAACGTGTGTCTACGTCAGC      |
| <i>shd</i>    | -200     | GGATCGATGGAAGCACTTGT        | ACGATGGGAGGCGATTTA         |
| <i>dKeap1</i> | 700      | AAGGTTTTGCCTCTTCAGCA        | CGGCTTTAAATTTCCGCATA       |
| <i>gstD1</i>  | -1000    | CATGTGCCTTTGACTCATCATT      | GACCATAAAAATATAACCGTTTTTCG |
| <i>Rp49</i>   | 0        | TCCTTCCAGCTTCAAGATGAC       | GTGCGCTTCTTCACGATCT        |
| <i>Actn3</i>  | 1200     | CGAAGAAACAGCCAAAATCG        | GGACGCCACTTTGTATTGAAC      |
| <i>Gapdh1</i> | 300      | GAAAAGCGGCAGTCGTAAT         | AATTCGATCTTCGACATGG        |
